# Supplementary material for: Synthesis and structure of mono-, bi- and trimetallic amine-bis(phenolate) cobalt(ii) complexes
Source: Royal Society of Chemistry journal article supplement (doi:10.1039/c002843f), 2010-01-01
Supplement: c002843f.pdf [file c002843f.pdf]

**Electronic Supplementary Information for**  
**Synthesis and Structure of Mono-, Bi- and Trimetallic Amine-**  
**bis(phenolate) Cobalt(II) complexes**

*Uttam K. Das,<sup>a</sup> Julia Bobak,<sup>a</sup> Candace Fowler,<sup>a</sup> Sarah E. Hann,<sup>a</sup> Chad F. Petten,<sup>a</sup> Louise N. Dawe,<sup>b</sup>  
Andreas Decken,<sup>c</sup> Francesca M. Kerton<sup>\*a</sup> and Christopher M. Kozak<sup>\*a</sup>*

<sup>a</sup> Department of Chemistry, Memorial University of Newfoundland, St. John's,

Newfoundland, Canada A1B 3X7. Fax: +1-709-737-3702

<sup>b</sup> C-CART X-ray Diffraction Laboratory, Memorial University of Newfoundland, St. John's,

Newfoundland, Canada A1B 3X7

<sup>c</sup> Department of Chemistry, University of New Brunswick, Fredericton,

New Brunswick, Canada E3B 5A3

E-mail: [fkerton@mun.ca](mailto:fkerton@mun.ca); [ckozak@mun.ca](mailto:ckozak@mun.ca)

This journal is © The Royal Society of Chemistry 2010

Summary of Data for **3**, {Co[O<sub>2</sub>NN']<sup>AmAmPy</sup>}<sub>2</sub>Formula: C<sub>40</sub>H<sub>58</sub>Co<sub>1</sub>N<sub>2</sub>O<sub>2</sub>

\*\*\*\*\* Unit Cell Parameters \*\*\*\*\*      \*\*\*\*\* Model Refinement \*\*\*\*\*

|         |           |                           |        |
|---------|-----------|---------------------------|--------|
| a:      | 29.293(5) | R factor[all data]:       | 0.215  |
| b:      | 10.521(2) | R1 factor[I>2.0sigma(I)]: | 0.195  |
| c:      | 23.542(4) | Rw factor[all data]:      | 0.546  |
| alpha:  | 90.000    | goodness of fit:          | 2.134  |
| beta:   | 90.000    | # of observations:        | 7520   |
| gamma:  | 90.000    | # of variables:           | 407    |
| volume: | 7256(2)   | refl/para ratio:          | 18.5   |
|         |           | maximum shift/error:      | 0.64   |
|         |           | Refinement program:       | SHELXL |
|         |           | Refinement mode:          | Single |

\*\*\*\*\* Space Group Information \*\*\*\*\*

\*\*\*\*\* Reflection Corrections \*\*\*\*\*

|                     |              |                      |             |
|---------------------|--------------|----------------------|-------------|
| symbol:             | Pbcn         | absorption applied:  | No          |
| number:             | 60           | abs. type:           | NUM2        |
| centricity:         | centric      | abs. range:          | 0.883-0.978 |
| Z value:            | 8            | decay applied:       | No          |
| formula weight:     | 657.84       | decay (%):           | 0.00        |
| calculated density: | 1.204        | redundants averaged: | Yes         |
| mu (cm-1):          | 5.085        |                      |             |
| crystal system:     | orthorhombic |                      |             |
| laue group:         | mmm          |                      |             |
| lattice type:       | P            |                      |             |

\*\*\*\*\* Reflection Processing \*\*\*\*\*      \*\*\*\*\* Experimental Information \*\*\*\*\*

|                    |       |                    |        |
|--------------------|-------|--------------------|--------|
| total # processed: | 62442 | radiation:         | Mo     |
| total # unique:    | 7520  | wavelength:        | 0.7107 |
| R merge (%):       | 5.68  | max. 2theta:       | 61.8   |
| Wilson B:          | 3.80  | sin(theta)/lambda: | 0.7225 |
|                    |       | temperature (C):   | -120.0 |

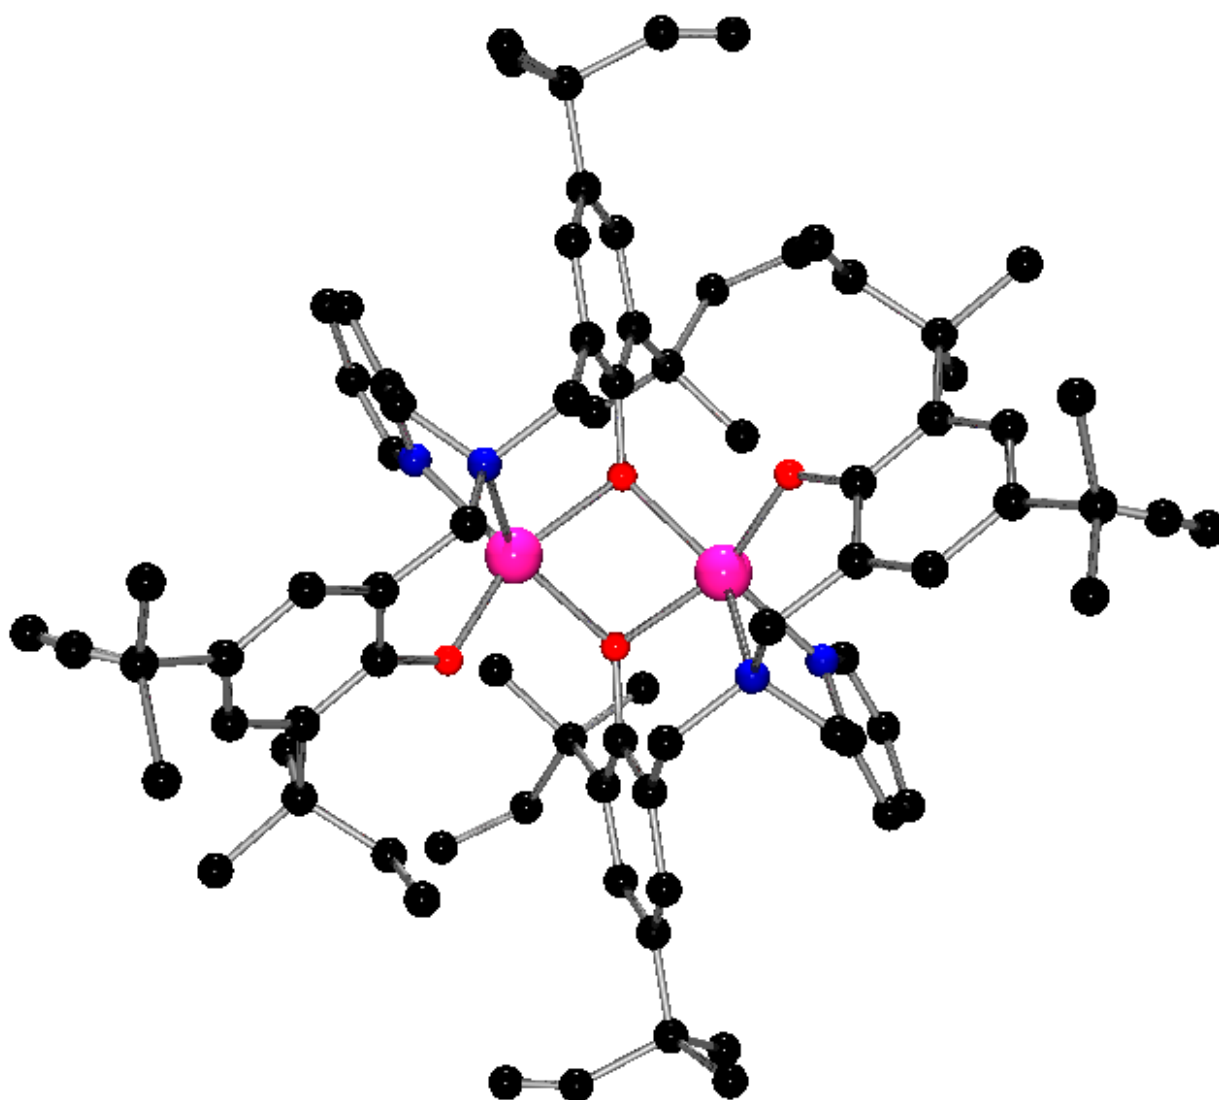

**Figure S1:** Ball and stick model of **3**,  $\{\text{Co}[\text{O}_2\text{NN}']^{\text{AmAmPy}}\}_2$

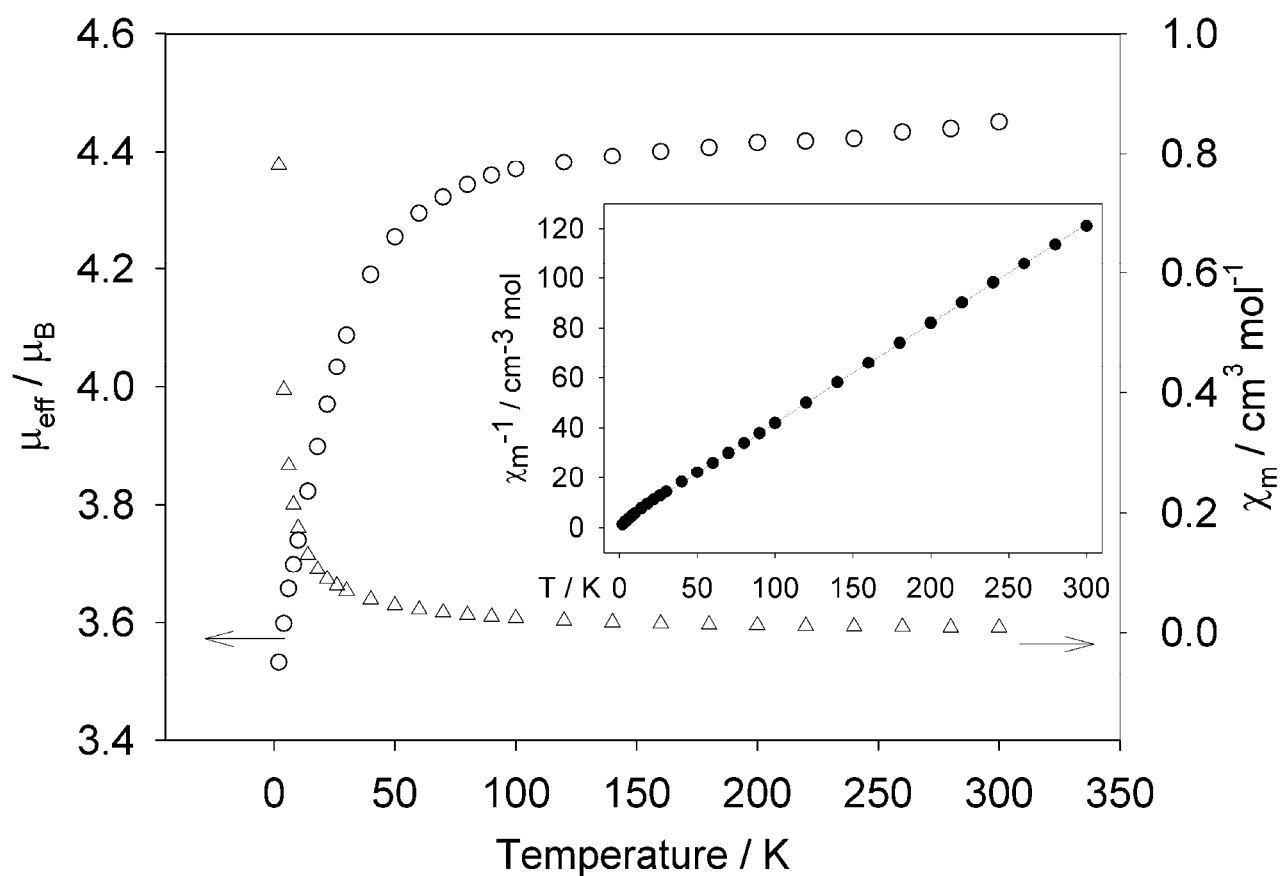

**Figure S2:** Magnetic moment ( $\circ$ ), susceptibility ( $\Delta$ ) and inverse susceptibility (inset) versus temperature data for **1**(CH<sub>3</sub>OH). The solid line represents the best fit for the Curie-Weiss model,  $\chi_{\text{M}} = C/(T - \theta)$ , where  $\chi_{\text{M}}^{-1} = 0.4003T + 1.8298$  ( $R^2 = 0.9999$ ) giving a Curie constant,  $C$ , of 2.50 emu/mol (resulting in a  $g$ -value of 2.3) and  $\theta = -4.57$  K.

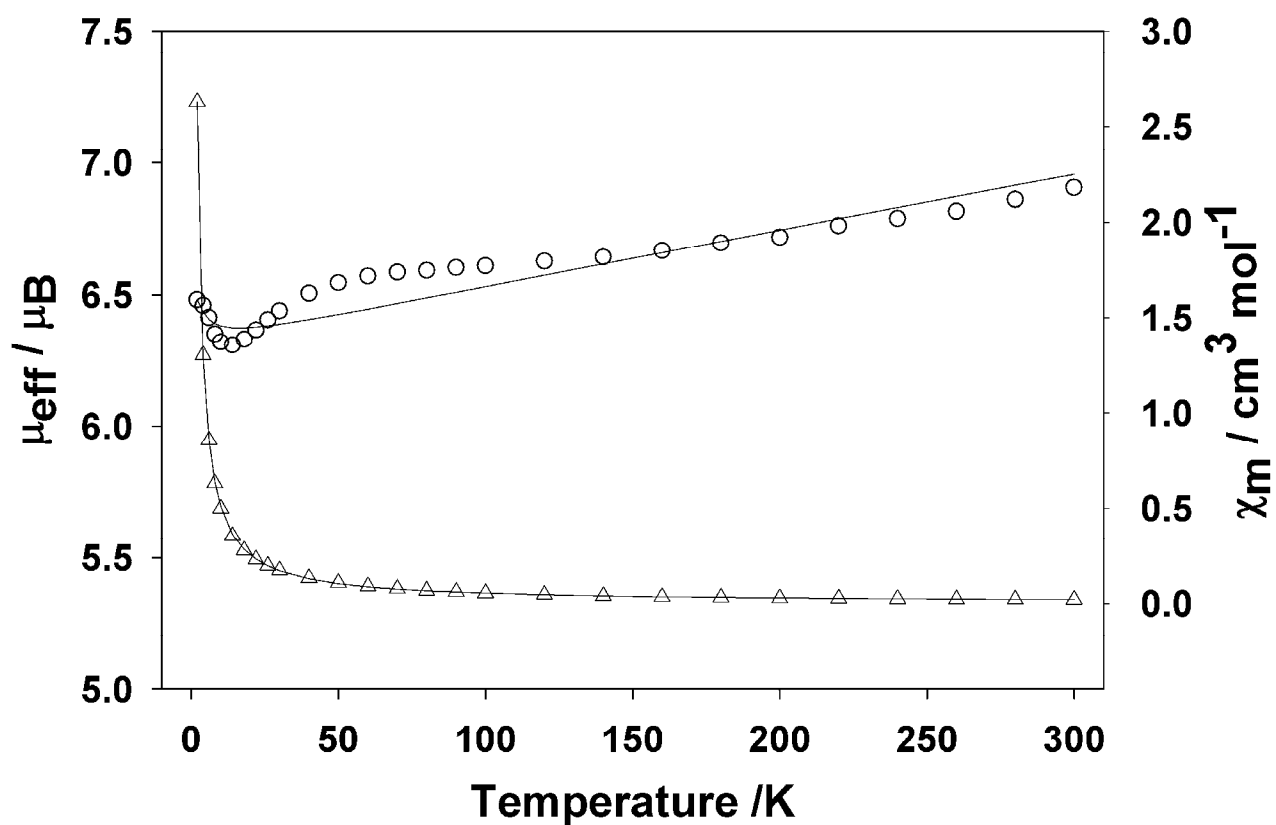

**Figure S3:** Magnetic moment ( $\circ$ ) and susceptibility ( $\Delta$ ) versus temperature data for **3**. The solid lines represent the best fit for the Heisenberg dimer model for two  $S = 3/2$  ions.

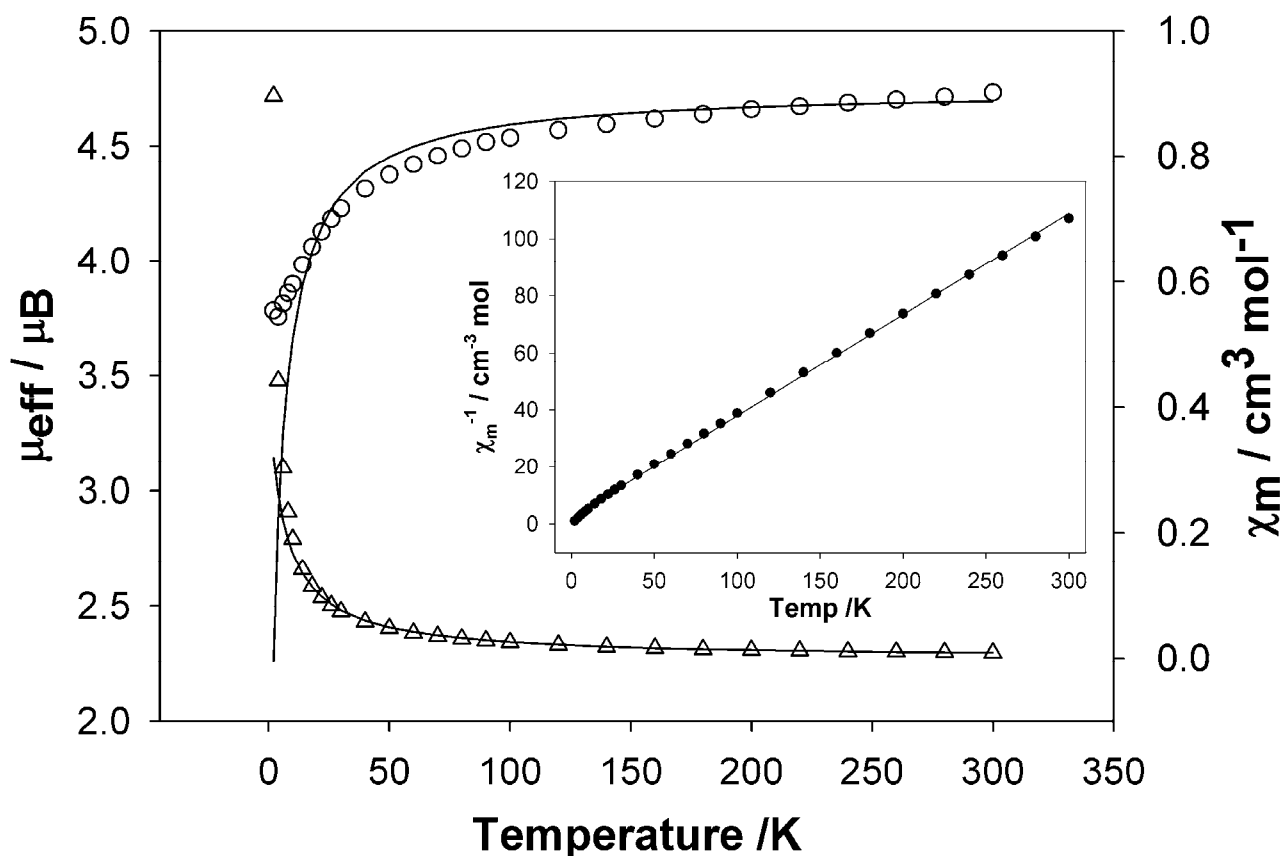

**Figure S4:** Magnetic moment ( $\circ$ ), susceptibility ( $\Delta$ ) and inverse susceptibility (inset) versus temperature data per Co atom for **4**. The solid line represents the best fit for the Curie-Weiss model,  $\chi_{\text{M}} = C/(T - \theta)$ , where  $\chi_{\text{M}}^{-1} = 0.355T + 2.4174$  ( $R^2 = 0.9993$ ) giving a Curie constant,  $C$ , of 2.82 emu/mol (resulting in a  $g$ -value of 2.45) and  $\theta = -6.81$  K.

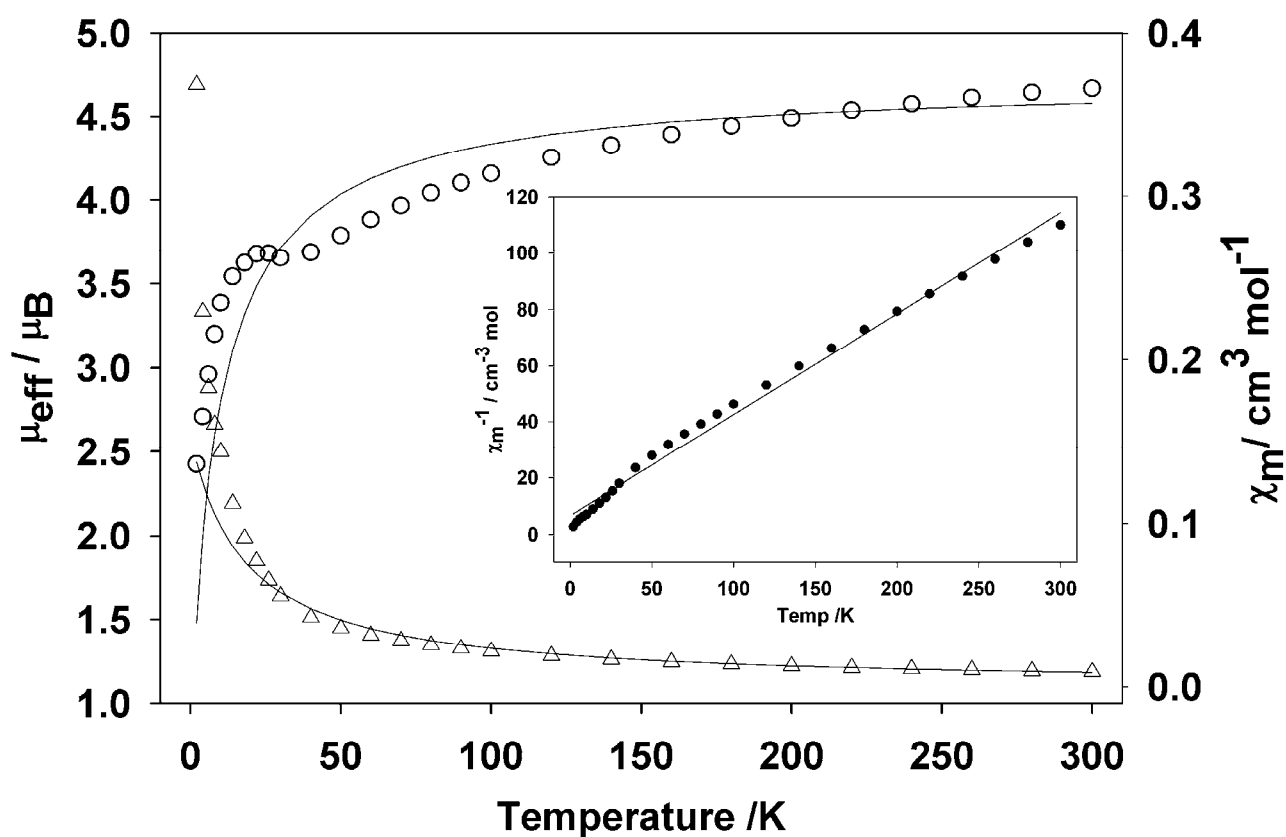

**Figure S5:** Magnetic moment ( $\circ$ ), susceptibility ( $\Delta$ ) and inverse susceptibility (inset) versus temperature data per Co atom for **5**. The solid line represents the best fit for the Curie-Weiss model,  $\chi_M = C/(T - \theta)$ , where  $\chi_M^{-1} = 0.3595T + 6.5754$  ( $R^2 = 0.9925$ ) giving a Curie constant,  $C$ , of 2.78 emu/mol (resulting in a  $g$ -value of 2.44) and  $\theta = -18.29$  K.

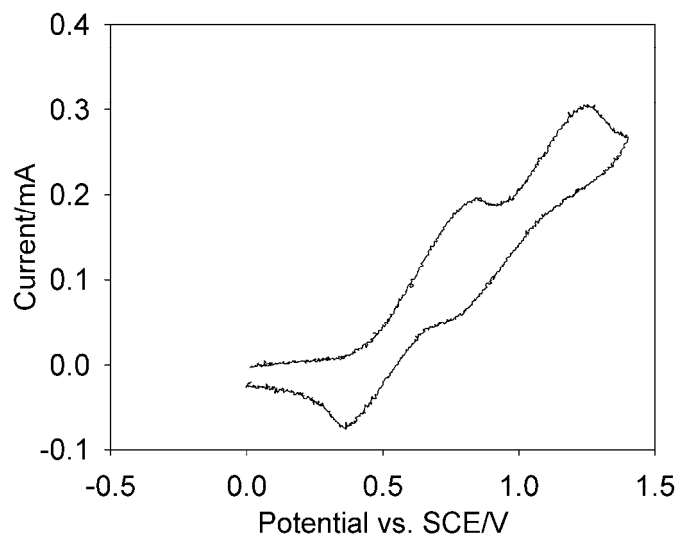

**Figure S6:** Cyclic voltammogram of **1** in CH<sub>2</sub>Cl<sub>2</sub> (0.1M [(*n*-Bu)<sub>4</sub>N]PF<sub>6</sub>) at 20 °C and a scan rate of 100 mV s<sup>-1</sup>.

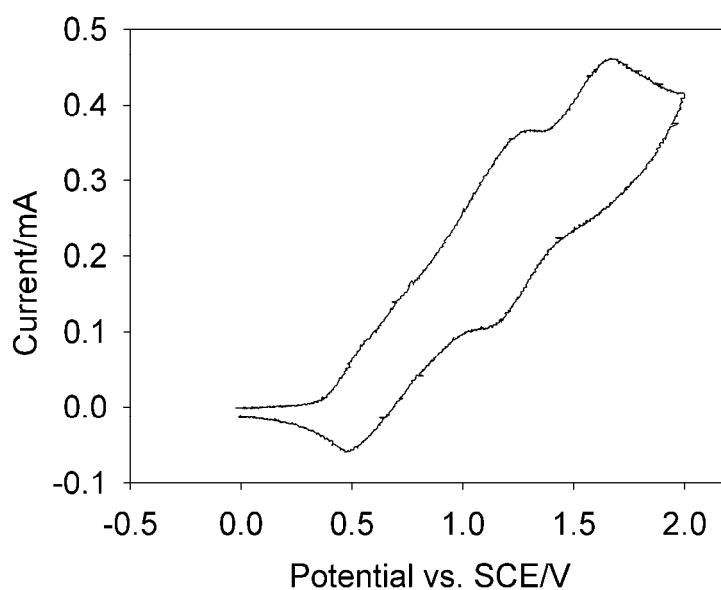

**Figure S7:** Cyclic voltammogram of **4** in CH<sub>2</sub>Cl<sub>2</sub> (0.1M [(*n*-Bu)<sub>4</sub>N]PF<sub>6</sub>) at 20 °C and a scan rate of 100 mV s<sup>-1</sup>.



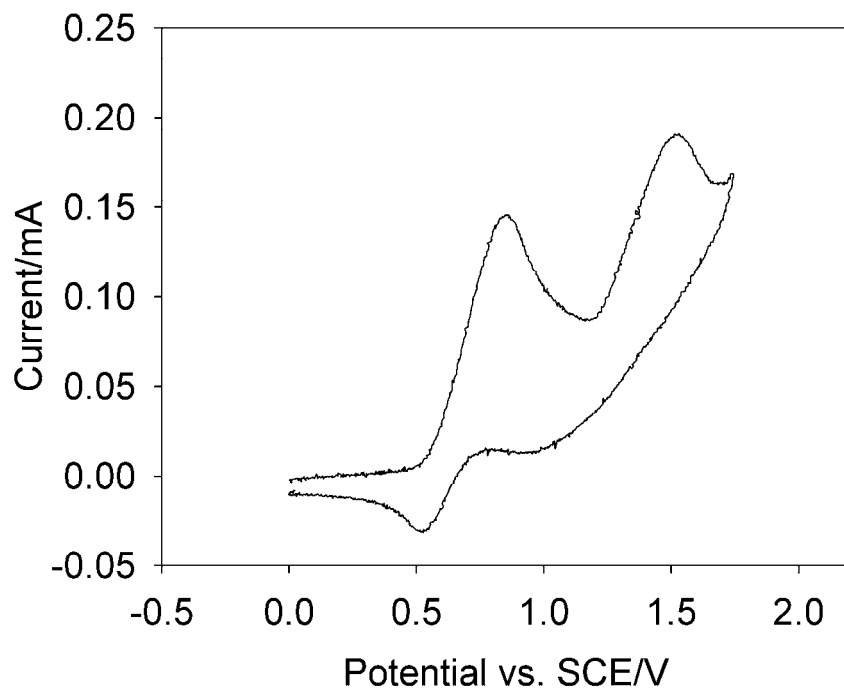

**Figure S8:** Cyclic voltammogram of  $\text{H}_2[\text{O}_2\text{NN}']^{\text{BuBuNMMe}_2}$  in  $\text{CH}_2\text{Cl}_2$  (0.1M  $[(n\text{-Bu})_4\text{N}]\text{PF}_6$ ) at 20 °C and a scan rate of 100  $\text{mV s}^{-1}$ .
